# Supplementary material for: Early life origins of chronic obstructive pulmonary disease
Source: HighWire-hosted journal article supplement (doi:10.1136/thx.2008.112136), 2009-09-02
Supplement: Thorax_Appendix_112136.pdf [file Thorax_Appendix_112136.pdf]

## On-line repository

### “Early life origins of chronic obstructive pulmonary disease”

Svanes C et al

#### List of investigators in the Early life Working Group in ECRHS

Chair: Cecilie Svanes. Members: Shyamali Dharmage, Melbourne, Australia; Thorarinn Gislason, Reykjavik; Maria Gunnbjörnsdóttir, Uppsala; Joachim Heinrich, Neuherberg; Deborah Jarvis, London; Benedicte Leynaert, Paris; Dora Ludvigsdóttir, Reykjavik; Roberto de Marco, Verona; Francoise Neukirch, Paris; Chantal Raheison, Paris; Jordi Sunyer, Barcelona; Simona Villani, Pavia, Matthias Wjst, Neuherberg.

#### List of Principal Investigators and Senior Scientific Teams in ECRHS

Belgium: South Antwerp & Antwerp City (P Vermeire, J Weyler, M Van Sprundel, V Nelen). Estonia: Tartu (R Jogi, A Soon). France: Paris (F Neukirch, B Leynaert, R Liard, M Zureik), Grenoble (I Pin, J Ferran-Quentin). Germany: Erfurt (J Heinrich, M Wjst, C Frye, I Meyer). Iceland: Reykjavik (T Gislason, E Bjornsson, D Gislason, T Blondal, KB Jorundsdóttir). Italy: Turin (M Bugiani, P Piccioni, E Caria, A Carosso, E Migliore, G Castiglioni), Verona (R de Marco, G Verlatto, E Zanolin, S Accordini, A Poli, V Lo Cascio, M Ferrari), Pavia (A Marinoni, S Villani, M Ponzio, F Frigerio, M Comelli, M Grassi, I Cerveri, A Corsico). Netherlands: Groningen & Geleen (J Schouten, M Kerkhof). Norway: Bergen (A Gulsvik, E Omenaas, C Svanes, B Laerum). Spain: Barcelona (JM Antó, J Sunyer, M Kogevinas, JP Zock, X Basagana, A Jaen, F Burgos), Huelva (J Maldonado, A Pereira, JL Sanchez), Albacete (J Martinez-Moratalla Rovira, E Almar), Galdakao (N Muniozguen, I Urritia), Oviedo (F Payo). Sweden: Uppsala (C Janson, G Boman, D Norback, M Gunnbjörnsdóttir), Goteborg (K Toren, L Lillienberg, AC Olin, B Balder, A Pfeifer-Nilsson, R Sundberg), Umea (E Norrman, M Soderberg, K Franklin, B Lundback, B Forsberg, L Nystrom). Switzerland: Basel (N Künzli, B Dibbert, M Hazenkamp, M Brutsche, U Ackermann-Liebrich). United Kingdom: Norwich (D Jarvis, B Harrison), Ipswich (D Jarvis, R Hall, D Seaton)

Centres taking part at their own expense: Australia: Melbourne (M Abramson, S Dharmage, J Raven, EH Walters). France: Bordeaux (A Taytard, C Raheison), Montpellier (J Bousquet, P Demoly). Germany: Hamburg (K Richter). USA: Portland (M Osborne, S Buist, W Vollmer, L Johnson).

#### Funding

None of the study sponsors/funders had any role on study design, data collection, data analysis, data interpretation or writing of the report. The corresponding author had full access to all the data in the study and had full responsibility for the decision to submit for publication.

The first author, Cecilie Svanes, was supported by a grant from the Norwegian Research Council.

The coordination of ECRHS II was supported by the European Commission, as part of their Quality of Life programme. The following bodies funded the local studies in ECRHS II in this article.

*Albacete*—Fondo de Investigaciones Santarias (grant code: 97/0035-01,

99/0034-01, and 99/0034-02), Hospital Universitario de Albacete, Consejería de Sanidad. *Antwerp*—FWO (Fund for Scientific Research)- Flanders Belgium (grant code: G.0402.00), University of Antwerp, Flemish Health Ministry.

*Barcelona*—Fondo de Investigaciones Sanitarias (grant code: 99/0034-01, and 99/0034-02), Red Respira (RTIC 03/11 ISC IIF).

*Basel*—Swiss National Science Foundation, Swiss Federal Office for Education & Science, Swiss National Accident Insurance Fund (SUVA).

*Bergen*—Norwegian Research Council; Norwegian Asthma & Allergy Association (NAAF); Glaxo Wellcome AS, Norway Research Fund.

*Bordeaux*—Institut Pneumologique d'Aquitaine.

*Erfurt*—GSF—National Research Centre for Environment & Health, Deutsche Forschungsgemeinschaft (DFG) (grant code FR 1526/1-1).

*Galdakao*—Basque Health Department.

*Göteborg*—Swedish Heart Lung Foundation, Swedish Foundation for Health Care Sciences & Allergy Research, Swedish Asthma & Allergy Foundation, Swedish Cancer & Allergy Foundation.

*Grenoble*—Programme Hospitalier de Recherche Clinique-DRC de Grenoble 2000 no. 2610, Ministry of Health, Direction de la Recherche Clinique, Ministère de l'Emploi et de la Solidarité, Direction Générale de la Santé, CHU de Grenoble, Comité des Maladies Respiratoires de l'Isère.

*Hamburg*—GSF—National Research Centre for Environment & Health, Deutsche Forschungsgemeinschaft (DFG) (grant code MA 711/4-1).

*Ipswich and Norwich*—National Asthma Campaign (UK).

*Huelva*—Fondo de Investigaciones Sanitarias (FIS) (grant code: 97/0035-01, 99/0034-01, and 99/0034-02).

*Montpellier*—Programme Hospitalier de Recherche Clinique-DRC de Grenoble 2000 no. 2610, Ministry of Health, Direction de la Recherche Clinique, CHU de Grenoble, Ministère de l'Emploi et de la Solidarité, Direction Générale de la Santé, Aventis (France), Direction Régionale des Affaires Sanitaires et Sociales Languedoc-Roussillon. *Oviedo*—Fondo de Investigaciones Sanitarias (FIS) (grant code: 97/0035-01, 99/0034-01, and 99/0034-02).

*Paris*—Ministère de l'Emploi et de la Solidarité, Direction Générale de la Santé, UCBPharma (France), Aventis (France), Glaxo France, Programme Hospitalier de Recherche Clinique-DRC de Grenoble 2000 no. 2610, Ministry of Health, Direction de la Recherche Clinique, CHU de Grenoble.

*Pavia*—Glaxo, Smith & Kline Italy, Italian Ministry of University and Scientific and Technological Research (MURST), Local University Funding for Research 1998 & 1999 (Pavia, Italy).

*Portland*—American Lung Association of Oregon, Northwest Health Foundation, Collins Foundation, Merck Pharmaceutical.

*Reykjavik*—Icelandic Research Council, Icelandic University Hospital Fund.

*Tartu*—Estonian Science Foundation.

*Turin*—ASL 4 Regione Piemonte (Italy), AO CTO/ICORMA Regione Piemonte (Italy), Ministero dell'Università e della Ricerca Scientifica (Italy), Glaxo Wellcome spa (Verona, Italy).

*Umeå*—Swedish Heart Lung Foundation, Swedish Foundation for Health Care Sciences & Allergy Research, Swedish Asthma & Allergy Foundation, Swedish Cancer & Allergy Foundation.

*Uppsala*—Swedish Heart Lung Foundation, Swedish Foundation for Health Care Sciences & Allergy Research, Swedish Asthma & Allergy Foundation, Swedish Cancer & Allergy Foundation.

*Verona*—University of Verona; Italian Ministry of University and Scientific and Technological Research (MURST); Glaxo, Smith & Kline Italy.

The following bodies funded ECRHS I for centres in ECRHS II:

Asthma Foundation of Victoria, Allen+Hanburys (Australia); Belgian Science Policy Office, National Fund for Scientific Research; Ministère de la Santé, Glaxo France, Institut Pneumologique d'Aquitaine, Contrat de Plan Etat-Région Languedoc-Roussillon, CNMATS, CNMRT (90MR/10, 91AF/6), Ministre délégué de la santé, RNSP, France; GSF, and the Bundesminister für Forschung und Technologie, Bonn, Germany; Ministero dell'Università e della Ricerca Scientifica e Tecnologica, CNR, Regione Veneto grant RSF n. 381/05.93, Italy; Norwegian Research Council project no. 101422/310; Dutch Ministry of Wellbeing, Public Health and Culture, Netherlands; Ministerio de Sanidad y Consumo FIS (grants #91/0016060/00E-05E and #93/0393), and grants from Hospital General de Albacete, Hospital General Juan Ramón Jiménez, Consejería de Sanidad, Principado de Asturias, Spain; The Swedish Medical Research Council, the Swedish Heart Lung

Foundation, the Swedish Association against Asthma and Allergy; Swiss National Science Foundation grant 4026-28099; National Asthma Campaign, British Lung Foundation, Department of Health, South Thames Regional Health Authority, UK; United States Department of Health, Education and Welfare Public Health Service (grant #2 S07 RR05521-28).

## Legends to figures

On-line repository, figure 1. Meta-analysis of the association of adult FEV<sub>1</sub> with one or more childhood disadvantage factors by centre in (A) men and (B) women, adjusted for smoking status, age and height. Boxes shows adjusted difference in FEV<sub>1</sub> in reference to those with 0 childhood disadvantage factors, horizontal lines show 95%CI, diamond shows combined estimate for all centres with 95%CI. Analyses include 8201 measurements in men and 8631 measurements in women with complete data, as measured in ECRHS I and ECRHS II.

On-line repository, table 1. Adult FEV<sub>1</sub> and decline in FEV<sub>1</sub> per year of follow-up in men and women, according to all childhood factors registered in ECRHS I.

|                                     |           | FEV <sub>1</sub> * |                      |               |                      | decline in FEV <sub>1</sub> † |                      |               |                      |
|-------------------------------------|-----------|--------------------|----------------------|---------------|----------------------|-------------------------------|----------------------|---------------|----------------------|
|                                     |           | MEN                |                      | WOMEN         |                      | MEN                           |                      | WOMEN         |                      |
|                                     |           | <i>number</i>      | <i>Mean</i>          | <i>number</i> | <i>Mean</i>          | <i>number</i>                 | <i>Mean</i>          | <i>number</i> | <i>Mean</i>          |
|                                     |           | ‡                  | FEV <sub>1</sub> (l) | ‡             | FEV <sub>1</sub> (l) | ‡                             | FEV <sub>1</sub> (l) | ‡             | FEV <sub>1</sub> (l) |
| Maternal asthma                     | No        | 9290               | 4.26                 | 9516          | 3.15                 | 2975                          | -32.6                | 3042          | -24.7                |
|                                     | Yes       | 522                | 4.17                 | 748           | 3.06                 | 160                           | -30.4                | 234           | -28.1                |
| Paternal asthma                     | No        | 9064               | 4.26                 | 9276          | 3.15                 | 2910                          | -32.6                | 2957          | -24.5                |
|                                     | Yes       | 553                | 4.09                 | 649           | 3.01                 | 173                           | -32.7                | 214           | -26.9                |
| Maternal atopy                      | No        | 7724               | 4.24                 | 7712          | 3.13                 | 2499                          | -32.1                | 2497          | -24.3                |
|                                     | Yes       | 1619               | 4.31                 | 2313          | 3.18                 | 477                           | -32.9                | 703           | -26.5                |
| Paternal atopy                      | No        | 8074               | 4.24                 | 7994          | 3.14                 | 2589                          | -31.9                | 2563          | -24.4                |
|                                     | Yes       | 1181               | 4.29                 | 1633          | 3.16                 | 378                           | -35.9                | 519           | -26.3                |
| Childhood asthma                    | No        | 9808               | 4.26                 | 10196         | 3.14                 | 3154                          | -32.3                | 3263          | -24.9                |
|                                     | Yes       | 422                | 4.00                 | 315           | 3.04                 | 118                           | -35.4                | 89            | -20.7                |
| Severe respiratory infection <5 yrs | No        | 8713               | 4.26                 | 8866          | 3.15                 | 2778                          | -32.3                | 2815          | -24.8                |
|                                     | Yes       | 916                | 4.17                 | 1098          | 3.07                 | 289                           | -34.7                | 352           | -25.2                |
| Maternal smoking                    | No        | 7657               | 4.25                 | 7733          | 3.13                 | 2495                          | -31.1                | 2484          | -24.3                |
|                                     | Yes       | 2433               | 4.26                 | 2703          | 3.16                 | 733                           | -36.6                | 844           | -26.5                |
| Paternal smoking                    | No        | 3362               | 4.32                 | 3556          | 3.19                 | 1080                          | -32.9                | 1150          | -23.7                |
|                                     | Yes       | 6531               | 4.22                 | 6630          | 3.12                 | 2090                          | -32.2                | 2108          | -25.4                |
| N° of siblings:                     | 0         | 1109               | 4.28                 | 1060          | 3.16                 | 355                           | -33.7                | 325           | -26.0                |
|                                     | 1         | 3136               | 4.33                 | 3216          | 3.19                 | 988                           | -32.1                | 1025          | -23.9                |
|                                     | 2         | 2590               | 4.27                 | 2671          | 3.18                 | 846                           | -31.3                | 850           | -25.9                |
|                                     | 3         | 1565               | 4.20                 | 1608          | 3.10                 | 517                           | -33.1                | 517           | -24.3                |
|                                     | 4 or more | 1844               | 4.12                 | 1966          | 3.04                 | 571                           | -33.5                | 638           | -25.1                |
| Order of birth:                     | 0         | 4313               | 4.28                 | 4204          | 3.14                 | 1393                          | -33.4                | 1340          | -25.7                |
|                                     | 1         | 3047               | 4.25                 | 3114          | 3.16                 | 979                           | -31.7                | 980           | -24.7                |
|                                     | 2         | 1477               | 4.27                 | 1716          | 3.14                 | 472                           | -32.3                | 555           | -23.5                |
|                                     | 3 or more | 1396               | 4.15                 | 1468          | 3.09                 | 430                           | -31.5                | 473           | -25.3                |
| Day care:                           | No        | 5181               | 4.21                 | 5637          | 3.10                 | 1747                          | -34.3                | 1910          | -27.9                |
|                                     | Yes       | 4824               | 4.30                 | 4744          | 3.19                 | 1445                          | -30.3                | 1406          | -20.7                |
| Pet at EC1:                         | No pet    | 3834               | 4.29                 | 3779          | 3.16                 | 1264                          | -32.7                | 1249          | -25.7                |
|                                     | Cat       | 1734               | 4.24                 | 1923          | 3.14                 | 594                           | -33.5                | 647           | -26.7                |
|                                     | Dog       | 1853               | 4.23                 | 1776          | 3.14                 | 558                           | -32.1                | 513           | -22.5                |
|                                     | Cat&Dog   | 2817               | 4.21                 | 3050          | 3.12                 | 863                           | -31.6                | 953           | -23.9                |
| Season of birth:                    | Spring    | 2671               | 4.25                 | 2785          | 3.13                 | 862                           | -32.0                | 915           | -25.2                |
|                                     | Summer    | 2488               | 4.26                 | 2642          | 3.14                 | 788                           | -32.2                | 827           | -24.7                |
|                                     | Autumn    | 2457               | 4.24                 | 2421          | 3.14                 | 790                           | -31.8                | 779           | -23.6                |
|                                     | Winter    | 2653               | 4.26                 | 2707          | 3.15                 | 844                           | -33.7                | 842           | -26.0                |

\* Level of forced expiratory volume in one second as measured in ECRHS I and ECRHS II

† Decline in forced expiratory volume in one second in ml per year of follow-up (FEV<sub>1</sub> in ECRHS II minus FEV<sub>1</sub> in ECRHS I).

‡ Sums (yes+no) differ due to a different number with missing information for each variable. Numbers refer to numbers of measurements for FEV<sub>1</sub> and number of individuals with two measurements for FEV<sub>1</sub> decline.

On-line repository, table 2. Characteristics of study population according to number of childhood disadvantage factors\*.

|                                |          | All    | Number of childhood disadvantage factors |       |        |        |
|--------------------------------|----------|--------|------------------------------------------|-------|--------|--------|
|                                |          |        | 0                                        | 1     | 2      | ≥3     |
| <i>N</i> †                     |          | 13,359 | 8,000                                    | 4,224 | 979    | 156    |
|                                |          |        | (60%)                                    | (32%) | (7.4%) | (1.2%) |
| <b>Adult smoking status</b>    |          |        |                                          |       |        |        |
| Never                          | (%)      | 43.4   | 44.0                                     | 42.4  | 42.8   | 42.3   |
| Ex                             | (%)      | 23.8   | 23.9                                     | 24.0  | 22.9   | 23.3   |
| Current <10                    | (%)      | 12.6   | 12.9                                     | 12.5  | 11.3   | 10.7   |
| Current 10-20                  | (%)      | 9.7    | 9.4                                      | 10.3  | 10.3   | 8.4    |
| Current >20                    | (%)      | 10.4   | 9.9                                      | 10.9  | 12.8   | 15.4   |
| BMI (kg/m <sup>2</sup> )       | (median) | 23.8   | 23.7                                     | 23.8  | 24.0   | 23.9   |
| Height                         | (mean)   | 1.71   | 1.71                                     | 1.71  | 1.70   | 1.70   |
| Age                            | (mean)   | 36.9   | 37.2                                     | 36.5  | 36.8   | 35.9   |
| <b>Age completed education</b> |          |        |                                          |       |        |        |
| >22 years                      | (%)      | 28.8   | 28.9                                     | 27.8  | 30.9   | 33.6   |
| 18-22 years                    | (%)      | 31.2   | 31.5                                     | 31.6  | 27.2   | 30.4   |
| ≤18 years                      | (%)      | 40.1   | 39.6                                     | 40.6  | 42.0   | 36.0   |
| <b>Social Class</b>            |          |        |                                          |       |        |        |
| I-II Professionals             | (%)      | 30.1   | 30.2                                     | 30.3  | 28.1   | 34.1   |
| III Non-manual                 | (%)      | 18.2   | 18.1                                     | 18.2  | 19.2   | 17.5   |
| III Manual                     | (%)      | 16.6   | 16.0                                     | 17.7  | 15.5   | 22.0   |
| IV-V Unskilled                 | (%)      | 12.9   | 12.0                                     | 14.2  | 16.0   | 9.4    |
| Unclassified                   | (%)      | 22.2   | 23.7                                     | 19.7  | 21.2   | 17.0   |
| Current asthma                 | (%)      | 5.1    | 2.9                                      | 6.0   | 15.5   | 29.5   |
| Current wheeze                 | (%)      | 13.1   | 10.1                                     | 16.0  | 23.1   | 33.8   |
| Atopy                          | (%)      | 30.4   | 28.2                                     | 32.3  | 37.8   | 48.3   |

\* Maternal asthma, paternal asthma, childhood asthma, respiratory infections, and maternal smoking constituted the childhood disadvantage factors.

† *N* includes number of persons with data on lung function and childhood factors. Using person-surveys gave almost identical results.

On-line repository, table 3. Full models for associations of adult FEV<sub>1</sub>\* with (A) individual childhood factors mutually adjusted for each other and (B) number of childhood disadvantage factors, when including adjustment for current adult asthma, wheeze and atopy. Analyses include 7435 measurements in men and 7655 measurements in women with complete data.

|                                       | MEN                                                       |                  |        | WOMEN                                                     |                 |        |
|---------------------------------------|-----------------------------------------------------------|------------------|--------|-----------------------------------------------------------|-----------------|--------|
|                                       | Adjusted difference in FEV <sub>1</sub> <sup>†</sup> (ml) | 95% CI           | p-val  | Adjusted difference in FEV <sub>1</sub> <sup>†</sup> (ml) | 95% CI          | p-val  |
| <b>A</b>                              |                                                           |                  |        |                                                           |                 |        |
| Baseline FEV <sub>1</sub> (ml) ‡      | 4401.1                                                    |                  |        | 3214.8                                                    |                 |        |
| Maternal asthma                       | -47.9                                                     | (-111.7, 15.8)   | 0.141  | -15.6                                                     | (-54.1, 22.9)   | 0.427  |
| Paternal asthma                       | -79.9                                                     | (-140.1, -19.7)  | 0.009  | -46.8                                                     | (-86.6, -7.0)   | 0.021  |
| Childhood asthma                      | -180.5                                                    | (-257.6, -103.3) | <0.001 | -80.4                                                     | (-141.5, -19.3) | 0.010  |
| Severe respiratory infection <5 years | -67.3                                                     | (-115.4, -19.1)  | 0.006  | -28.0                                                     | (-60.4, 4.3)    | 0.089  |
| Maternal smoking                      | -33.7                                                     | (-67.9, 0.4)     | 0.053  | -28.4                                                     | (-52.2, -4.6)   | 0.019  |
| <b>B</b>                              |                                                           |                  |        |                                                           |                 |        |
| Baseline FEV <sub>1</sub> (ml) ‡      | 4390.9                                                    |                  |        | 3222.6                                                    |                 |        |
| Number of childhood factors           |                                                           |                  |        |                                                           |                 |        |
| 1                                     | -43.9                                                     | (-73.5, -14.3)   | 0.004  | -40.6                                                     | (-61.3, -19.9)  | <0.001 |
| 2                                     | -158.3                                                    | (-211.6, -105.0) | <0.001 | -57.7                                                     | (-93.9, -21.6)  | 0.002  |
| 3 or more                             | -149.5                                                    | (-274.5, -24.5)  | 0.019  | -137.5                                                    | (-226.2, -48.7) | 0.002  |
| <i>For comparison:</i>                |                                                           |                  |        |                                                           |                 |        |
| Adult smoking status                  |                                                           |                  |        |                                                           |                 |        |
| Ex                                    | 9.3                                                       | (-22.4, 41.1)    | 0.564  | 31.5                                                      | (9.8, 53.2)     | 0.004  |
| Current <10 cig/day                   | -32.4                                                     | (-69.8, 4.9)     | 0.089  | -10.7                                                     | (-35.8, 14.3)   | 0.400  |
| Current 10-20 cig/day                 | -64.6                                                     | (-103.0, -26.1)  | <0.001 | 1.4                                                       | (-26.1, 28.8)   | 0.922  |
| Current >20 cig/day                   | -103.6                                                    | (-142.8, -64.5)  | <0.001 | -75.5                                                     | (-107.4, -43.7) | <0.001 |
| Age at completed education            |                                                           |                  |        |                                                           |                 |        |
| 18-22 years                           | -17.3                                                     | (-45.8, 11.2)    | 0.233  | -22.9                                                     | (-42.6, -3.1)   | 0.023  |
| ≤18 years                             | -65.7                                                     | (-97.9, -33.5)   | <0.001 | -49.5                                                     | (-71.9, -27.1)  | <0.001 |
| Social Class (I-II)                   |                                                           |                  |        |                                                           |                 |        |
| III Non-manual                        | -37.2                                                     | (-85.3, 11.0)    | 0.130  | -8.4                                                      | (-36.5, 19.6)   | 0.555  |
| III Manual                            | -52.6                                                     | (-92.8, -12.3)   | 0.010  | -29.1                                                     | (-68.4, 10.3)   | 0.148  |
| IV-V Unskilled                        | -16.5                                                     | (-66.4, 33.4)    | 0.517  | -9.2                                                      | (-43.2, 24.8)   | 0.596  |
| Unclassified                          | -100.7                                                    | (-156.3, -45.1)  | <0.001 | -25.1                                                     | (-59.0, 8.7)    | 0.146  |
| Current asthma                        | -208.1                                                    | (-267.0, -149.2) | <0.001 | -114.6                                                    | (-150.5, -78.6) | <0.001 |
| Current wheeze                        | -103.2                                                    | (-133.7, -72.7)  | <0.001 | -92.6                                                     | (-115.9, -69.3) | <0.001 |
| Current atopy                         | -6.7                                                      | (-31.2, 17.8)    | 0.594  | -15.8                                                     | (-34.5, 3.0)    | 0.101  |

\* Forced expiratory volume in one second as measured in ECRHS I and ECRHS II.

† Difference in FEV<sub>1</sub> (A) between subjects with and subjects without childhood factor, when adjusting for other childhood factors in the table (B) between subjects with a specific number of childhood factors and subjects with zero childhood factors. Analysed using generalized estimating equations models allowing for

dependency between two lung function measurements of the same individual, and adjusting for smoking status, age at completed education, social class, current asthma, current wheeze, atopy, age, height and centre.

‡ Baseline FEV<sub>1</sub> in never-smoking, high education, professional, median age, median height subjects with none of the childhood disadvantage factors, and no current adult asthma, wheeze or atopy.



On-line repository, table 4a. Associations of adult FEV<sub>1</sub>\* with individual childhood disadvantage factors (**A**) and with number of childhood disadvantage factors (**B**); when excluding all subjects with childhood asthma and excluding childhood asthma from the childhood disadvantage factors. Analyses include 7906 measurements in men and 8395 measurements in women with complete data.

|                                           | MEN (N=7,906)                                             |                |        | WOMEN (N= 8,395)                                          |                |        |
|-------------------------------------------|-----------------------------------------------------------|----------------|--------|-----------------------------------------------------------|----------------|--------|
|                                           | Adjusted difference in FEV <sub>1</sub> <sup>†</sup> (ml) | 95% CI         | p-val  | Adjusted difference in FEV <sub>1</sub> <sup>†</sup> (ml) | 95% CI         | p-val  |
| <b>A</b>                                  |                                                           |                |        |                                                           |                |        |
| Baseline FEV <sub>1</sub> (ml) ‡          | 4385.7                                                    |                |        | 3192.5                                                    |                |        |
| Maternal asthma                           | -53.2                                                     | (-117.1,10.7)  | 0.103  | -32.0                                                     | (-70.3,6.2)    | 0.101  |
| Paternal asthma                           | -77.4                                                     | (-138.3,-16.4) | 0.013  | -50.1                                                     | (-89.8,-10.3)  | 0.014  |
| Severe respiratory infection before 5 yrs | -68.3                                                     | (-117.2,-19.5) | 0.006  | -32.0                                                     | (-64.4,0.4)    | 0.053  |
| Maternal smoking                          | -41.7                                                     | (-75.3,-8.1)   | 0.015  | -32.3                                                     | (-55.5,-9.1)   | 0.006  |
| <b>B</b>                                  |                                                           |                |        |                                                           |                |        |
| Baseline FEV <sub>1</sub> (ml) ‡          | 4377.9                                                    |                |        | 3200.2                                                    |                |        |
| Number of childhood factors               |                                                           |                |        |                                                           |                |        |
| 1                                         | -44.7                                                     | (-73.9,-15.4)  | 0.003  | -43.7                                                     | (-63.9,-23.5)  | <0.001 |
| 2                                         | -134.7                                                    | (-193.0,-76.3) | <0.001 | -55.2                                                     | (-93.1,-17.4)  | 0.004  |
| 3                                         | -141.3                                                    | (-335.0,52.4)  | 0.153  | -201.0                                                    | (-329.0,-73.0) | 0.002  |
| <i>For comparison:</i>                    |                                                           |                |        |                                                           |                |        |
| Adult smoking status                      |                                                           |                |        |                                                           |                |        |
| Former                                    | 4.0                                                       | (-26.5,34.5)   | 0.798  | 28.5                                                      | (7.5,49.6)     | 0.008  |
| Current <10 cig/day                       | -40.4                                                     | (-75.8,-5.1)   | 0.025  | -5.8                                                      | (-29.8,18.2)   | 0.637  |
| Current 10-20 cig/day                     | -74.8                                                     | (-111.3,-38.2) | <0.001 | -17.3                                                     | (-43.6,9.0)    | 0.197  |
| Current >20 cig/day                       | -105.0                                                    | (-142.0,-68.0) | <0.001 | -77.6                                                     | (-107.6,-47.6) | <0.001 |

\* Forced expiratory volume in one second.

† Difference in FEV<sub>1</sub> (**A**) between subjects with and subjects without childhood factor, when adjusting for other childhood factors in the table (**B**) between subjects with a specific number of childhood factors and subjects with zero childhood factors. Adjusted for smoking status, age at completed education, social class, age, height and centre.

‡ Baseline FEV<sub>1</sub> in never-smoking, high education, professional, median age, median height subjects with none of the childhood disadvantage factors.

§ Estimates for adult smoking are presented in order to enable comparison of estimates. The estimates are from model B, but are practically identical in model A.

On-line repository, table 4b. Associations of decline in adult FEV<sub>1</sub>\* with individual childhood disadvantage factors (**A**) and with number of childhood disadvantage factors (**B**) in 5498 persons with complete data, excluding all subjects with childhood asthma and excluding childhood asthma from the childhood disadvantage factors.

|                                                              | <b>adjusted<br/>difference<br/>in <math>\Delta</math>FEV<sub>1</sub><sup>†</sup><br/>(ml/year)</b> | <b>95% CI</b> | <b>p-val</b> |
|--------------------------------------------------------------|----------------------------------------------------------------------------------------------------|---------------|--------------|
| <b>A</b>                                                     |                                                                                                    |               |              |
| <i>Baseline <math>\Delta</math>FEV<sub>1</sub> (ml/yr) ‡</i> | -22.9                                                                                              |               |              |
| Maternal asthma                                              | -0.4                                                                                               | (-3.7,2.8)    | 0.795        |
| Paternal asthma                                              | -2.0                                                                                               | (-5.2,1.2)    | 0.215        |
| Severe respiratory infection <<br>5 yrs                      | -1.5                                                                                               | (-4.1,1.0)    | 0.235        |
| Maternal smoking                                             | -1.2                                                                                               | (-3.0,0.7)    | 0.219        |
| <b>B</b>                                                     |                                                                                                    |               |              |
| <i>Baseline <math>\Delta</math>FEV<sub>1</sub> (ml/yr) ‡</i> | -23.3                                                                                              |               |              |
| Number of childhood factors                                  |                                                                                                    |               |              |
| 1                                                            | -1.7                                                                                               | (-3.3,-0.1)   | 0.037        |
| 2                                                            | -2.7                                                                                               | (-5.8,0.4)    | 0.089        |
| 3 or more                                                    | -5.9                                                                                               | (-16.0,4.1)   | 0.249        |
| <i>p for trend</i>                                           | <i>0.016</i>                                                                                       |               |              |
| <i>For comparison:</i>                                       |                                                                                                    |               |              |
| Adult smoking status                                         |                                                                                                    |               |              |
| Former                                                       | 3.4                                                                                                | (1.6,5.1)     | <0.001       |
| Current <10 cig/day                                          | -1.2                                                                                               | (-4.2,1.8)    | 0.445        |
| Current 10-20 cig/day                                        | -4.2                                                                                               | (-7.1,-1.3)   | 0.004        |
| Current >20 cig/day                                          | -9.1                                                                                               | (-11.6,-6.6)  | <0.001       |

\* Decline in forced expiratory volume in one second in ml per year of follow-up (FEV<sub>1</sub> in ECRHS II minus FEV<sub>1</sub> in ECRHS I)

† Difference in decline in FEV<sub>1</sub> in ml per year of follow-up (**A**) between subjects with and subjects without childhood factor, when adjusting for other childhood factors in the table (**B**) between subjects with a specific number of childhood factors and subjects with zero childhood factors. Adjusted for FEV<sub>1</sub> at baseline, mid age, midage<sup>2</sup>, height at ECRHS II, difference in BMI, mid BMI, smoking, age at completed education, social class and centre.

‡ Baseline decline in FEV<sub>1</sub> per year of follow-up in never-smoking, high education, professional, median age, median height, median BMI subjects with none of the childhood disadvantage factors.

§ Estimates for adult smoking are presented in order to enable comparisons of estimates. The estimates are from model B, but are practically identical for model A.

On-line repository, table 4c. Associations of COPD\* with individual childhood disadvantage factors (A) and with number of childhood disadvantage factors (B) when excluding all subjects with childhood asthma and excluding childhood asthma from the childhood disadvantage factors. Analyses include 7905 measurements in men and 8395 measurements in women with complete data.

|                                         | MEN (N=7,905)   |             |        | WOMEN (N=8,395) |             |        |
|-----------------------------------------|-----------------|-------------|--------|-----------------|-------------|--------|
|                                         | OR <sup>†</sup> | 95% CI      | p-val  | OR <sup>†</sup> | 95% CI      | p-val  |
| (A)                                     |                 |             |        |                 |             |        |
| Maternal asthma                         | 1.71            | (0.72-4.04) | 0.221  | 1.69            | (0.77-3.73) | 0.194  |
| Paternal asthma                         | 2.30            | (1.15-4.61) | 0.019  | 2.55            | (1.29-5.03) | 0.007  |
| Severe respiratory infection<br>< 5 yrs | 1.52            | (0.78-2.98) | 0.221  | 0.53            | (0.19-1.45) | 0.216  |
| Maternal smoking                        | 1.35            | (0.80-2.29) | 0.264  | 1.64            | (0.95-2.81) | 0.075  |
| (B)                                     |                 |             |        |                 |             |        |
| Number of childhood factors             |                 |             |        |                 |             |        |
| 0 (ref.)                                | 1               |             |        | 1               |             |        |
| 1                                       | 1.40            | (0.87-2.23) | 0.164  | 1.61            | (0.98-2.64) | 0.060  |
| 2 or 3                                  | 2.54            | (1.28-5.03) | 0.007  | 2.27            | (1.14-4.53) | 0.020  |
| <i>For comparison ‡:</i>                |                 |             |        |                 |             |        |
| Adult smoking status                    |                 |             |        |                 |             |        |
| Former                                  | 2.77            | (1.44-5.35) | 0.002  | 1.18            | (0.61-2.29) | 0.631  |
| Current <10 cig/day                     | 3.31            | (1.52-7.23) | 0.003  | 1.03            | (0.40-2.64) | 0.952  |
| Current 10-20 cig/day                   | 3.03            | (1.40-6.53) | 0.005  | 2.41            | (1.19-4.88) | 0.015  |
| Current >20 cig/day                     | 4.42            | (2.25-8.69) | <0.001 | 4.95            | (2.71-9.05) | <0.001 |

\* COPD defined as FEV<sub>1</sub>/FVC ratio <0.70 and FEV<sub>1</sub><80% predicted, lung function measurements from ECRHS I and ECRHS II.

† Odds ratio (OR) for COPD (A) comparing subjects with and without each childhood factor, when adjusting for other childhood factors in the table (B) comparing subjects with a specific number of childhood factors with subjects with zero childhood factors. Adjusted for smoking status, age completed education, social class, age, height and centre.

‡ Estimates for adult smoking are presented in order to enable comparisons of estimates. The estimates are from model B, but are practically identical for model A.
