# Supplementary figures and images for: Early life origins of chronic obstructive pulmonary disease
Source: HighWire-hosted journal article supplement (doi:10.1136/thx.2008.112136), 2009-09-02

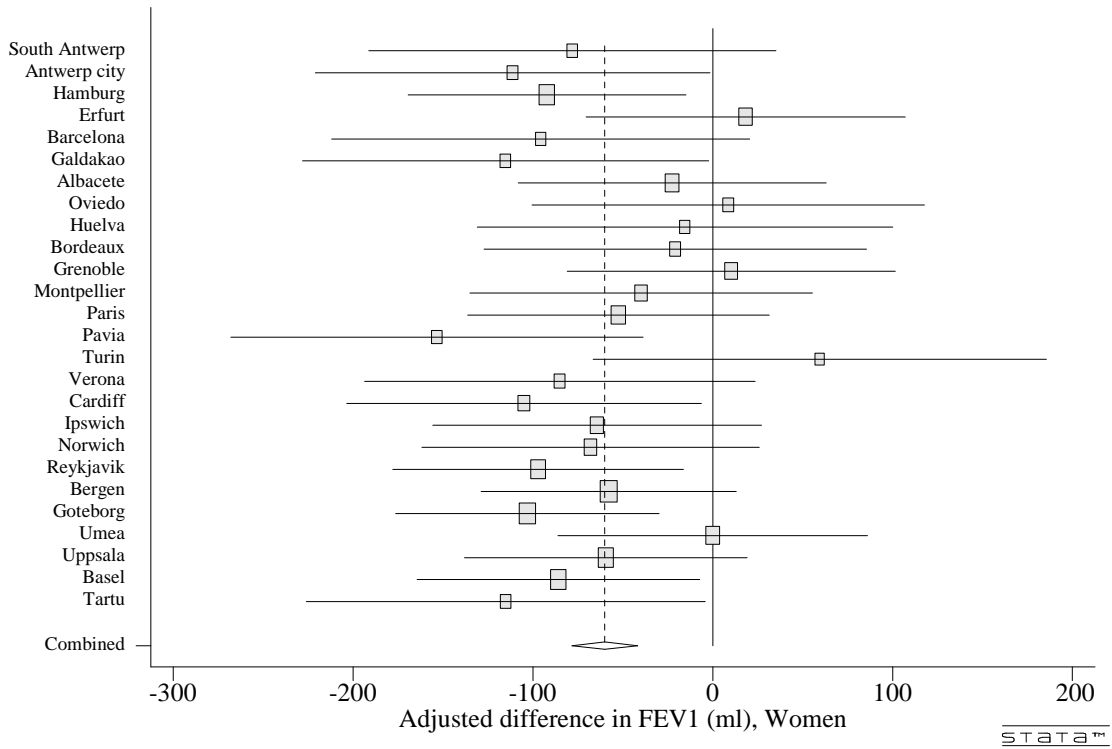

Supplement: Thorax_Figure1B_112136.pdf [file Thorax_Figure1B_112136.pdf]
